Maor *et al.* Evolution of activity patterns in mammals

14 **Most modern mammals, including strictly diurnal species, exhibit sensory adaptations**  
15 **to nocturnal activity, thought to be the result of a prolonged nocturnal phase or**  
16 **'bottleneck' during early mammalian evolution. Nocturnality may have allowed**  
17 **mammals to avoid antagonistic interactions with diurnal dinosaurs during the**  
18 **Mesozoic. However, understanding the evolution of mammalian activity patterns is**  
19 **hindered by scant and ambiguous fossil evidence. While ancestral reconstructions of**  
20 **behavioural traits from extant species have the potential to elucidate these patterns,**  
21 **existing studies have been limited in taxonomic scope. Here, we use an extensive**  
22 **behavioural dataset for 2415 species from all extant orders to reconstruct ancestral**  
23 **activity patterns across Mammalia. We find strong support for the nocturnal origin of**  
24 **mammals and the Cenozoic appearance of diurnality, although cathemerality (mixed**  
25 **diel periodicity) may have appeared in the late Cretaceous. Simian primates are among**  
26 **the earliest mammals to exhibit strict diurnal activity, some 52-33Mya. Our study is**  
27 **consistent with the hypothesis that temporal partitioning between early mammals and**  
28 **dinosaurs during the Mesozoic led to a mammalian nocturnal bottleneck, but also**  
29 **demonstrates the need for improved phylogenetic estimates for Mammalia.**

30       Although mammals exhibit striking morphological, behavioural and ecological niche  
31 diversity<sup>1</sup>, the distribution of mammalian activity patterns is strongly biased towards  
32 nocturnality<sup>2</sup>. Additionally, most mammalian species, including strictly diurnal ones, exhibit  
33 visual adaptations to nocturnal activity that are similar to those of nocturnal birds and  
34 reptiles<sup>3</sup>. For example, mammals lack photoreception mechanisms (e.g. parietal organs) that  
35 are found in other amniotes<sup>3</sup>, and exhibit reduced diversity of active photoreceptors<sup>4,5</sup>.  
36 Additionally, there is evidence that enhanced olfactory sensitivity<sup>6</sup>, broader frequency range  
37 hearing<sup>7</sup>, and sophisticated whisker-mediated tactile perception<sup>8</sup> may have evolved in  
38 mammals to compensate for insufficient visual information<sup>3,5</sup>. In general, species exhibit

Maor *et al.* Evolution of activity patterns in mammals

39 characteristic patterns of activity distribution over the 24-hour (diel) cycle, and as  
40 environmental conditions may change radically, yet predictably between day and night,  
41 activity patterns allow individuals to anticipate fluctuations, and time activity optimally<sup>9,10</sup>.  
42 Physiological and behavioural adaptations to different activity patterns are significant to  
43 individual fitness<sup>11</sup>, and therefore to species evolutionary success<sup>12,13</sup>. Moreover, long-term  
44 shifts in activity patterns may reveal shifts in selective regimes, caused by changes in biotic  
45 and abiotic conditions<sup>13,14</sup>.

46         The predominance of nocturnal adaptations in mammals may be the result of a  
47 prolonged nocturnal phase in the early stages of mammalian evolution, after which emerged  
48 the more diverse patterns observed today<sup>5,15</sup>. This ‘nocturnal bottleneck’ hypothesis suggests  
49 that mammals were restricted to nocturnal activity by antagonistic interactions with the  
50 ecologically dominant diurnal dinosaurs during the Mesozoic<sup>5,15,16</sup>. The Cretaceous-  
51 Paleogene (K-Pg) mass extinction event circa 66Mya, led to the extinction of all non-avian  
52 dinosaurs along with the marine- and flying reptiles, and the majority of other vertebrates,  
53 and invertebrate and plant taxa<sup>17,18</sup>. This event marks the end of the Mesozoic ‘reign of  
54 dinosaurs’ and the transition to the mammal-dominated Cenozoic fauna. If an antagonistic  
55 interaction with dinosaurs was an important factor in restricting early mammals to nocturnal  
56 activity, then all Mesozoic mammals are expected to have been nocturnal, and diurnal  
57 mammals would have only appeared after the K-Pg mass extinction event.

58         Support for the nocturnal bottleneck hypothesis remains indirect. For example, some  
59 Synapsids, the non-mammalian lineage ancestral to mammals, were adapted to nocturnal  
60 activity >300Mya, suggesting a nocturnal origin for mammals<sup>19</sup>. However, as all modern  
61 mammals (except monkeys and apes) have nocturnal morphological adaptations regardless of  
62 their activity<sup>3,20</sup>, inferring activity patterns from fossil cranial morphology may be unreliable.  
63 Evidence from genetic and histological studies of the evolutionary development of

Maor *et al.* Evolution of activity patterns in mammals

64 mammalian eyes indicate that nocturnal adaptations preceded diurnal ones<sup>4,21</sup>, but this does  
65 not help elucidate questions around the timing of these adaptations. Ancestral reconstructions  
66 of behavioural traits using a phylogenetic comparative approach may help to understand both  
67 the pattern and timing of the evolution of activity patterns in mammals since activity patterns  
68 have been shown to be genetically determined<sup>22</sup> yet responsive to selective pressures<sup>10</sup>.  
69 However, phylogenetic studies of mammalian activity patterns so far have focused on two  
70 mammalian orders – primates<sup>23-25</sup> and rodents<sup>26</sup>. Primate activity patterns have been studied  
71 extensively, and some evidence suggests that primate diurnality originated in the most recent  
72 common ancestor (MRCA) of suborder Haplorrhini (all monkeys, apes and tarsiers)<sup>13</sup> in the  
73 Mesozoic<sup>27,28</sup>. It is conceivable, although thus far not tested, that diurnal diversifications in  
74 other orders of Mesozoic origins, e.g. Scandentia (treeshrews), Macroscelidea (elephant  
75 shrews) and Rodentia, could have occurred before the extinction of dinosaurs, calling for a  
76 wider examination of how activity patterns evolved across mammals.

77         Here, we use an extensive dataset of activity patterns for 2415 mammal species,  
78 representing 135 of the 148 extant families and all extant orders (Supplementary Table 1) to  
79 investigate ancestral activity patterns in mammals, and to understand the timings of the  
80 appearance of mammal diurnality. We assign species to one of five activity patterns: (i)  
81 nocturnal – active only or mostly in the dark; (ii) diurnal – active only or mostly during  
82 daylight hours; (iii) cathemeral – active both during the day and during the night; (iv)  
83 crepuscular – active only at twilight, around sunrise and/or sunset; and (v) ultradian – active  
84 in cycles of a few hours. (see Methods). We map the three main activity patterns (nocturnal,  
85 cathemeral, and diurnal) onto two phylogenetic frameworks representing two of the main  
86 hypotheses of mammalian evolutionary history for our analyses, termed here short-fuse (SF)  
87 following<sup>28</sup> updated by<sup>29</sup>, and long-fuse (LF) phylogenies (adapted from<sup>27</sup>) (Fig. 1). We then  
88 use reversible jump Markov Chain Monte Carlo (rjMCMC) methods<sup>30</sup> to estimate transition

Maor *et al.* Evolution of activity patterns in mammals

89 rates between different activity states, and to infer the posterior probability (PP) of character  
90 states at each node in the phylogenies to examine the evolution of activity patterns of  
91 mammals and estimate support for the nocturnal bottleneck hypothesis.

92 **Results**

93 We find that the model values of  $PP_{\text{Noct}}$  (posterior probability of nocturnality) at the ancestral  
94 node of extant mammals were 0.74 (Credible Interval, CI 0.71-0.76) and 0.59 (CI 0.54-0.64)  
95 for SF and LF phylogenies, respectively, offering strong support for a nocturnal ancestor (Fig.  
96 2). In contrast, a cathemeral or a diurnal ancestral state is less well supported: modal value of  
97  $PP_{\text{Cath}}$  (posterior probability of cathemerality) = 0.24 (CI 0.23-0.26) and 0.31 (CI 0.29-0.33)  
98 for SF and LF, respectively, or  $PP_{\text{Diur}}$  (posterior probability of diurnality) = 0.02 (CI 0.01-  
99 0.03) SF and 0.1 (CI 0.07-0.14) LF (Fig. 2). The narrow and non-overlapping distributions of  
100 PP values across the activity pattern reconstructions indicate that our results are consistent  
101 and robust across samples of the rjMCMC chains, although the distributions are wider using  
102 the LF phylogeny (Fig. 2).

103         The first strong evidence (where the reconstructed activity pattern was supported by  
104 modal PP values  $>0.67$ ) in mammals of an expansion of temporal niche into cathemerality, is  
105 in the early Paleogene (Cenozoic) for the SF phylogeny (no later than 65.8Mya), or in the late  
106 Cretaceous (Mesozoic) for the LF phylogeny (no later than 74.7Mya) (Figs. 3 and 4).  
107 Although the LF phylogeny supports a Mesozoic shift to cathemerality, the modal PP values  
108 of the remaining 41 Mesozoic nodes were either nocturnal (23 nodes), or unclear – where all  
109 three activity patterns were supported by modal PP values  $<0.67$  (18 nodes). Using the SF  
110 phylogeny, we reconstruct the first transition to cathemerality in the MRCA of order  
111 Cetartiodactyla (cetaceans and even-toed ungulates). This taxa was likely to be cathemeral  
112 ( $PP_{\text{Cath}} = 0.79$  CI 0.72-0.87), and almost certainly exhibited considerable daytime activity

## Maor *et al.* Evolution of activity patterns in mammals

113 (PP<sub>Noct</sub> = 0.02 CI 0.01-0.04) (Fig. 3). Using the LF phylogeny, the first cathemeral transition  
114 was in the MRCA of families Soricidae (shrews) and Talpidae (moles) (PP<sub>Cath</sub> = 0.81 CI  
115 0.61-0.91; PP<sub>Diur</sub> = 0.07 CI 0.03-0.15) (Fig. 4).

116 Evidence of the evolution of diurnality (modal PP values >0.67) first appears in the  
117 early Paleogene (no later than 52.4Mya or 63.8Mya for SF and LF phylogeny, respectively)  
118 (Figs. 3 and 4). Using the SF phylogeny, we reconstruct transition to diurnality in the MRCA  
119 of the Simiiformes (all monkeys and apes) (PP<sub>Diur</sub> = 0.76, CI 0.75-0.78; PP<sub>Cath</sub> = 0.23, CI  
120 0.22-0.25) (Fig.3). Using the LF phylogeny, the first taxon to exhibit diurnal activity was the  
121 MRCA of the family Macroscelididae (elephant shrews) (PP<sub>Diur</sub> = 0.77, CI 0.76-0.80; PP<sub>Cath</sub> =  
122 0.22, CI 0.19-0.23; 63.8Mya), followed by the MRCA of families Ctenodactylidae (comb  
123 rats, Rodentia) (PP<sub>Diur</sub> = 0.76; CI 0.73-0.78; 61.6Mya), Camelidae (Cetartiodactyla) (PP<sub>Diur</sub> =  
124 0.74, CI 0.72-0.77; 59.6Mya), and Tupaiidae (treeshrews, Scandentia) (PP<sub>Diur</sub> = 0.99, CI  
125 0.99-0.99; 51.1Mya) in rapid succession (Fig. 4).

126 For both SF and LF phylogenies, we find that transition rates from a cathemeral pattern to  
127 either nocturnal or diurnal are about three times higher than the transition rates from either  
128 nocturnal or diurnal to cathemeral (Table 1). Furthermore, the transition rates in the SF  
129 reconstruction are three orders of magnitude lower than the respective rates in the LF  
130 reconstruction.

## 131 Discussion

132 We have shown that extant mammals likely originated from a nocturnal ancestor, and that  
133 these ancestors remained nocturnal throughout the Mesozoic until either 9 Myr before the K-  
134 Pg event (LF reconstruction), or just after it (SF reconstruction). On balance, our evidence  
135 suggests that mammals likely remained nocturnal throughout the Mesozoic as nocturnal  
136 activity is strongly supported at most Mesozoic nodes in both SF and LF reconstructions. We

Maor *et al.* Evolution of activity patterns in mammals

137 find strong evidence that the shift to strict diurnality occurred after the K-Pg event (both SF  
138 and LF reconstructions), although cathemerality may have appeared in the late Cretaceous  
139 (74.7Mya LF reconstruction). Combined with other sources of evidence<sup>5,21</sup>, our analysis helps  
140 to further establish the nocturnal ancestry of mammals and the timing of the evolution of  
141 diurnality, as predicted by the nocturnal bottleneck hypothesis, namely that diurnality only  
142 originated in mammals after the disappearance of the dinosaurs.

143         Even if we accept the appearance of cathemeral mammals as an expansion of the  
144 temporal niche before the K-Pg event, it does not necessarily provide strong evidence against  
145 the nocturnal bottleneck hypothesis. Declines in dinosaur diversity long before the K-Pg  
146 event have been suggested, either globally, starting at least 40Myr before the K-Pg event<sup>31</sup>, or  
147 locally – herbivorous dinosaurs in present-day North America were declining for up to  
148 15Myr prior to the event<sup>18</sup>. In contrast, fossils show that mammals had evolved considerable  
149 eco-morphological diversity as early as the mid-Jurassic period (174-164 Mya), and  
150 diversified along all axes of the ecological niche<sup>32,33</sup>, except the temporal axis. Moreover,  
151 extensive mammal radiations occurred following the Cretaceous Terrestrial Revolution  
152 (KTR, 120-80Mya), whereby angiosperms rose to dominate the global flora, and  
153 revolutionised eco-space<sup>27,34,35</sup>. Under such conditions, an invasion of mammals into the  
154 temporal niche of declining dinosaurs does not violate the assumption of temporal  
155 partitioning.

156         The MRCA of infraorder Simiiformes (monkeys and apes) was among the first taxa to  
157 have evolved diurnality (52.4Mya, SF reconstruction), and this is consistent with their  
158 evolution of diurnally-adapted vision<sup>3,4,20</sup> – a singularity in mammals. Other diurnal clades  
159 such as squirrels (Sciuridae) and elephant-shrews (Macroscelididae) evolved at about the  
160 same time as the Simiiformes<sup>27,28</sup> and presumably had similar opportunity to evolve  
161 diurnally-adapted vision, suggesting that diurnality in Simiiformes may have evolved

Maor *et al.* Evolution of activity patterns in mammals

162 considerably earlier than the minimum date of 52.4Mya. Simiiformes lie on an evolutionary  
163 branch that originates 83.2Mya (SF), when they diverged from tarsiers – their closest living  
164 relatives in the suborder Haplorrhini. Tarsiers are strictly nocturnal, but share with the  
165 Simiiformes several adaptations for high visual acuity, typical to diurnal vision<sup>25,36</sup>. The  
166 morphological and physiological adaptations to nocturnality in tarsiers are unlike those of any  
167 other nocturnal primate, suggesting that tarsiers originated from a diurnal ancestor, the  
168 MRCA of Haplorrhini, and secondarily adapted to nocturnal life<sup>13</sup>. The Haplorrhine MRCA  
169 was a Mesozoic species that lived until 83.2Mya (SF) or 78.1Mya (LF). This would imply  
170 that Mesozoic mammals were able to break out of the nocturnal bottleneck and endure direct  
171 interaction with dinosaurs following the KTR. Nevertheless, both reconstructions here, as  
172 well as other reconstructions of primate activity patterns based on different sets of data,  
173 including data on visual physiology, find weak or no evidence to the diurnality of the  
174 Haplorrhine MRCA<sup>23-25</sup>.

175         There are other uncertainties around the dates for three of the four taxa identified as  
176 shifting to diurnality within 7Myr after the K-Pg in the LF reconstruction (Macroscelididea,  
177 Ctenodactylidae, Camelidae). This is due to how we re-scaled the terminal-branches in<sup>27</sup> to  
178 produce the species-level LF phylogeny. However, according to the dates given in<sup>27</sup> and  
179 additional studies supporting the LF hypothesis<sup>37-40</sup>, these families originated in the  
180 Cenozoic, so our prediction of Cenozoic origins to mammal diurnality remains intact. The  
181 MRCA of Tupaiidae (Scandentia) and their closest living relative – the nocturnal  
182 Ptilocercidae (Pen-tailed tree shrews, a monotypic family) – has been placed in the Cenozoic,  
183 60.1 Mya<sup>27</sup> The LF reconstruction shows that this species was probably diurnal or  
184 cathemeral, but neither pattern was supported by PP values >0.67.

185         On both SF and LF reconstructions, the rates of transition from cathemeral activity to  
186 either nocturnal or diurnal imply that the diurnal and nocturnal niches may be more



Maor *et al.* Evolution of activity patterns in mammals

187 favourable for mammals. However, our results unequivocally support the persistence of  
188 cathemerality in mammals since the K-Pg. In primates, cathemerality has been argued  
189 adaptive under fluctuating environmental conditions<sup>23,41</sup> and cathemeral species show higher  
190 speciation rates (although lower overall diversification rates) compared to nocturnal and  
191 diurnal species<sup>24</sup>. If these patterns are also true for the rest of Mammalia, they could explain  
192 the persistence of mammal cathemerality against the net outflow of species and slow  
193 diversification rates. In Lepidoptera (moths and butterflies), the persistence of a mixed  
194 (cathemeral) diel activity pattern has been argued to be the result of conflicting predation  
195 pressures, from bats during the night and birds during the day<sup>42</sup>. Hence, cathemeral activity  
196 may be preferred when strong selective forces are acting at opposite directions. The  
197 appearance of mammal cathemerality may have been due to high nocturnal predation risk,  
198 perhaps from other mammals that would have made the nocturnal niche less advantageous.

199         The higher transition rates for the LF tree are likely a result of the method we used to  
200 construct the species-level LF phylogeny, i.e. re-scaling the branch lengths of species-level  
201 clades from the SF phylogeny<sup>28</sup> to maintain the length of the corresponding terminal branch  
202 provided by<sup>27</sup>. SF branch lengths were usually scaled down in this process, because the SF  
203 generally estimates older divergence dates than the LF, reflecting the difference between the  
204 two phylogenetic models. A consequence of our grafting procedure is that a band of  
205 artificially short branches is formed near these graft points, which implies rapid change.  
206 Higher rates allow for more change along tree branches, and reduce the precision of the  
207 results, which probably contributed to our LF reconstruction yielding fewer decisive  
208 predictions and lower statistical support compared with the SF reconstruction (Figs. 2, 3 and  
209 4). Whilst a direct comparison of transition rates between the two phylogenetic hypotheses is  
210 therefore precluded, the broad pattern of transitions (i.e. low transition rates into  
211 cathemerality and high transition rates out of it in either direction) is supported in both

Maor *et al.* Evolution of activity patterns in mammals

212 analyses, as is the general pattern of temporal niche evolution that emerges from the node  
213 reconstructions.

214         Although we have demonstrated the importance of the phylogenetic comparative  
215 approach to the investigation of the evolution of behavioural traits in mammals, ancestral  
216 reconstruction methods rely heavily on the accuracy of phylogenetic estimates. The LF  
217 hypothesis of mammalian evolutionary history is well supported<sup>27,37,40</sup>, but phylogenetic  
218 estimates are only available at family-level, and further modification was required to add the  
219 species-level information for our analysis. Despite the attention attracted recently by studies  
220 of mammalian phylogenies<sup>27,37,40,43</sup>, only the SF hypothesis is represented by a species-level  
221 phylogeny, making the incorporation of the LF hypothesis and the explosive model  
222 problematic for phylogenetic comparative analyses that are based on detailed species-level  
223 data.

224         In conclusion, we argue that the activity patterns of Mesozoic mammals are consistent  
225 with the prediction of temporal partitioning, and that the gradual acquisition of daytime  
226 activity in mammals, first cathemerality then diurnality, coincided with the decrease in  
227 pressure from dinosaurs, whether due to their decline or extinction. Given the current  
228 evidence, temporal partitioning within Mesozoic amniotes mostly followed the phylogenetic  
229 (mammal-archosaur) division, but while some dinosaurs invaded the nocturnal niche<sup>44</sup>, we  
230 find little support for Mesozoic mammals invading the diurnal niche. The constraints on  
231 mammals becoming diurnal during the Mesozoic would have been strong enough to  
232 counteract the ecological pressure to diversify, following at least 100Myr of mammalian  
233 sensory and eco-morphological radiations that sub-divided their nocturnal niches. Mammals  
234 diversified rapidly once they expanded outside the nocturnal niche, but whether invading the  
235 diurnal niche facilitated mammals' Cenozoic success remains to be answered.

Maor *et al.* Evolution of activity patterns in mammals

236 **Methods**

237 **Data.** We collated activity records for 2415 mammal species, representing all 29  
238 extant orders and 135 of 148 extant families from the PanTHERIA database<sup>1</sup>, and from  
239 published sources such as research articles, field guides, and encyclopaedias (Supplementary  
240 Table 1). Data collection was designed to incorporate extensive phylogenetic diversity,  
241 seeking to represent maximum ordinal diversity before targeting familial and generic  
242 diversity. We assigned each species into one of five activity patterns: (i) nocturnal – active  
243 only or mostly in the dark; (ii) diurnal – active only or mostly during daylight hours; (iii)  
244 cathemeral – active both during the day and during the night; (iv) crepuscular – active only at  
245 twilight, around sunrise and/or sunset; and (v) ultradian – active in cycles of a few hours. We  
246 follow the taxonomy and species binomials in Mammal Species of the World, 3<sup>rd</sup> Edition<sup>45</sup>,  
247 with one exception: we use Cetartiodactyla, instead of separate orders Artiodactyla and  
248 Cetacea, following<sup>46,47</sup>. We resolved conflicts where sources disagreed on species activity  
249 pattern as follows: (i) records with a combination of either nocturnal and crepuscular, or  
250 diurnal and crepuscular were changed to nocturnal or diurnal, respectively; (ii) records from  
251 compiled sources were preferred over localised studies (which are prone to idiosyncrasies);  
252 and (iii) records from more recent sources were preferred. This left 29 species unresolved and  
253 these species were excluded from subsequent analyses.

254 **Phylogenetic framework.** We used two phylogenetic frameworks representing two  
255 of the main hypotheses of mammalian evolutionary history for our analyses: the short-fuse  
256 (SF) hypothesis is represented by the species-level "best dates" supertree<sup>28</sup> updated from<sup>29</sup>,  
257 and the long-fuse (LF) hypothesis is represented by the amino-acid supermatrix phylogeny<sup>27</sup>  
258 (Fig.1). The SF hypothesis asserts that the most recent common ancestor (MRCA) of all  
259 extant mammals diverged into its daughter lineages (Prototheria and Theria) in the mid-  
260 Jurassic, 166.2Mya, whereas according to the LF hypothesis this divergence took place in the

Maor *et al.* Evolution of activity patterns in mammals

261 late-Triassic, 217.8Mya. Both hypotheses agree that multiple extant lineages diverged in the  
262 Cretaceous and survived the K-Pg event (Fig. 1), but the SF hypothesis posits that intra-  
263 ordinal divergence of placental mammals had already begun prior to the K-Pg event, while  
264 the LF hypothesis places intra-ordinal divergence in the Cenozoic. A third evolutionary  
265 hypothesis, the explosive model, is supported by fossil evidence and morphological data<sup>43</sup>,  
266 but has been criticised for implying impossibly-high rates of evolution in the early-Cenozoic  
267 radiation of placental mammals, and for other problems<sup>37,48</sup>, so we do not consider it here.

268         Here, we represent the LF hypothesis using the family-level supermatrix phylogeny<sup>27</sup>  
269 (downloaded from TreeBASE: <http://purl.org/phylo/treebase/phylovs/study/TB2:S11872> on  
270 01MAR2015). For our analyses we rendered it ultrametric, i.e. all the tips (species) of the tree  
271 are equidistant from the root, so that branch lengths are proportional to time. The LF  
272 hypothesis has recently gained support from several studies<sup>37-40</sup>, but it lacks species-level  
273 resolution, which is essential for our analysis. We therefore used each terminal branch of the  
274 supermatrix phylogeny (representing a taxonomic family) as a root branch onto which we  
275 appended the internal branching pattern of the family, as given in<sup>28</sup> updated from<sup>29</sup>. In order  
276 to retain the original LF timeline, we scaled the appended branching pattern to 85% of its  
277 original supermatrix phylogeny branch length, and the root branch completed the remaining  
278 15%. For this process we used functions from packages *ape*<sup>49</sup> and *phangorn*<sup>50</sup> in R version  
279 3.2.3<sup>51</sup>. Species that we had data for but that were absent from the phylogenetic frameworks  
280 were omitted from the analyses: 33 species from the SF phylogeny, and an additional 38  
281 species missing from the LF phylogeny as families Aotidae, Pitheciidae and Lepilemuridae  
282 (Primates) were not originally included in the supermatrix phylogeny<sup>27</sup>. Thus, our analyses  
283 consist of 60% nocturnal species (n = 1399 species; n = 1384 species for SF and LF  
284 phylogenies, respectively), 14% cathemeral species (n = 321 species SF; n = 320 species LF),  
285 and 26% diurnal species (n = 610 species SF; n = 588 species LF).

Maor *et al.* Evolution of activity patterns in mammals

286           **Analyses.** We used *BayesTraits* v3<sup>30</sup> to reconstruct the evolution of mammalian  
287 activity patterns. *BayesTraits* implements Markov Chain Monte Carlo (MCMC) methods to  
288 sample from the posterior distributions of transition rates for a transition matrix describing  
289 the evolution of a discrete character. The obtained posterior distribution allows the user to  
290 infer the posterior probability of each character state at the root and at each internal node of  
291 the phylogeny. By employing reversible jump MCMC (rjMCMC), *BayesTraits* is also able to  
292 sample from the posterior distribution of model configurations and optimise the number of  
293 parameters in the model. This removes the need for comparing models with different number  
294 of parameters by sampling from model space and parameter space concurrently<sup>52</sup>. We only  
295 consider the three main activity patterns across mammals in our analysis (nocturnal n = 1932  
296 species, diurnal n = 999, and cathemeral n = 415, Supplementary Table 1) in order to reduce  
297 the complexity of the model and increase its biological interpretability (four transition rates  
298 instead of 16). Additionally, we do not consider ultradian activity patterns as these are mostly  
299 found with polar and subterranean species, where the 24-hour cycle is of reduced importance.  
300 We consider an ordered model of trait evolution: Nocturnal↔Cathemeral↔Diurnal, whereby  
301 direct Nocturnal↔Diurnal transitions are not allowed (set to zero), because morphological  
302 and histological adaptations to diurnality and nocturnality are mutually exclusive, while  
303 cathemerality involves an intermediate state of the relevant phenotypes<sup>20,53</sup>. Our underlying  
304 hypothesis is that during shifts from diurnality to nocturnality (or vice versa) species go  
305 through a phase where they are equally well adapted to both. All other transition rates were  
306 free to take any value. We used rjMCMC to estimate the optimal model configuration<sup>52</sup>. As  
307 activity pattern in our analyses was not a binary trait, we used the ‘multistate’ mode of  
308 *BayesTraits* to sample from the posterior distribution of transition rates between activity  
309 pattern categories. For each phylogeny, we opted for the reversible-jump MCMC procedure,  
310 and set a wide uniform prior, bounded between 0 and 100 for all transition rates, to ensure

Maor *et al.* Evolution of activity patterns in mammals

311 that our prior did not have a strong effect on the nature of the posterior. Each rjMCMC chain  
312 was run until convergence was reached (at least one million iterations), after which point the  
313 chains were sampled every 4000 iterations until a posterior of 1000 samples was obtained.  
314 We chose this wide sampling interval in order to minimise autocorrelation in our posterior  
315 samples. We ran twelve replicates of each chain (corresponding a phylogeny) in order to  
316 ensure consistency, and that each independent run converged on the same posterior  
317 distribution. The marginal likelihoods of each chain were calculated using the stepping stone  
318 sampler<sup>54</sup> as implemented in *BayesTraits* (500 stones, 1000 iterations per stone) and  
319 compared between independent replicates to ensure consistency. In order to estimate the  
320 character state at each internal node, we used the modal value of the PP of each character  
321 state, calculated as the peak value of the kernel density of each posterior distribution. We  
322 used the R package *phytools*<sup>55</sup> to plot the PP values of each node on the mammal  
323 phylogenies (Figs. 3 and 4). To measure the accumulation of mammalian temporal niches  
324 over time, we calculated the running total of nodes (lineages) where an activity pattern was  
325 supported with  $PP > 0.67$ , and plotted this along the mammal evolution timeline (Figs. 3 and  
326 4). The confidence threshold of 0.67 was chosen because an activity pattern supported at this  
327 level would mean that the next most likely pattern is less than half as likely.

328 **Data Availability.** The authors declare that all data supporting the findings of this study are  
329 available within the paper and its supplementary information files. All data have been  
330 deposited on Figshare and will be made publically available after manuscript acceptance (doi:  
331 [10.6084/m9.figshare.4775416](https://doi.org/10.6084/m9.figshare.4775416); doi:10.6084/m9.figshare.4774648). Reprints and permissions  
332 information are available at [www.nature.com/reprints](http://www.nature.com/reprints).

333 **Code Availability.** Computer code essential for replicating the results in this study has been  
334 deposited on Figshare and will be made publicly available after manuscript acceptance (doi:  
335 [10.6084/m9.figshare.4797367](https://doi.org/10.6084/m9.figshare.4797367)).

Maor *et al.* Evolution of activity patterns in mammals

336 **References**

- 337 1 Jones, K. E. *et al.* PanTHERIA: a species-level database of life history, ecology, and  
338 geography of extant and recently extinct mammals. *Ecology* **90**, 2648-2648,  
339 doi:10.1890/08-1494.1 (2009).
- 340 2 Refinetti, R. The diversity of temporal niches in mammals. *Biological Rhythm*  
341 *Research* **39**, 173-192, doi:10.1080/09291010701682690 (2008).
- 342 3 Heesy, C. P. & Hall, M. I. The Nocturnal Bottleneck and the Evolution of Mammalian  
343 Vision. *Brain, Behavior and Evolution* **75**, 195-203 (2010).
- 344 4 Davies, W. I. L., Collin, S. P. & Hunt, D. M. Molecular ecology and adaptation of  
345 visual photopigments in craniates. *Molecular Ecology* **21**, 3121-3158,  
346 doi:10.1111/j.1365-294X.2012.05617.x (2012).
- 347 5 Gerkema, M. P., Davies, W. I. L., Foster, R. G., Menaker, M. & Hut, R. A. The  
348 nocturnal bottleneck and the evolution of activity patterns in mammals. *Proceedings*  
349 *of the Royal Society B: Biological Sciences* **280**, doi:10.1098/rspb.2013.0508 (2013).
- 350 6 Hayden, S. *et al.* Ecological adaptation determines functional mammalian olfactory  
351 subgenomes. *Genome Research* **20**, 1-9, doi:10.1101/gr.099416.109 (2010).
- 352 7 Coleman, M. N. & Boyer, D. M. Inner Ear Evolution in Primates Through the  
353 Cenozoic: Implications for the Evolution of Hearing. *The Anatomical Record:*  
354 *Advances in Integrative Anatomy and Evolutionary Biology* **295**, 615-631,  
355 doi:10.1002/ar.22422 (2012).
- 356 8 Diamond, M. E., von Heimendahl, M., Knutsen, P. M., Kleinfeld, D. & Ahissar, E.  
357 'Where' and 'what' in the whisker sensorimotor system. *Nat Rev Neurosci* **9**, 601-612,  
358 doi:[http://www.nature.com/nrn/journal/v9/n8/supinfo/nrn2411\\_S1.html](http://www.nature.com/nrn/journal/v9/n8/supinfo/nrn2411_S1.html) (2008).
- 359 9 Aronson, B. D. *et al.* Circadian rhythms. *Brain Research Reviews* **18**, 315-333,  
360 doi:[http://dx.doi.org/10.1016/0165-0173\(93\)90015-R](http://dx.doi.org/10.1016/0165-0173(93)90015-R) (1993).



Maor *et al.* Evolution of activity patterns in mammals

- 361 10 Kronfeld-Schor, N. & Dayan, T. Partitioning of Time as an Ecological Resource.  
362 *Annual Review of Ecology, Evolution, and Systematics* **34**, 153-181,  
363 doi:10.1146/annurev.ecolsys.34.011802.132435 (2003).
- 364 11 DeCoursey, P. J. Diversity of Function of SCN Pacemakers in Behavior and Ecology  
365 of Three Species of Sciurid Rodents. *Biological Rhythm Research* **35**, 13-33,  
366 doi:10.1080/09291010412331313214 (2004).
- 367 12 Hut, R. A., Kronfeld-Schor, N., van der Vinne, V. & De la Iglesia, H. in *Progress in*  
368 *Brain Research: The Neurobiology of Circadian Timing* Vol. 199 (eds A. Kalsbeek,  
369 M. Merrow, T. Roenneberg, & R.G. Foster) Ch. 17, 281-304 (Elsevier, 2012).
- 370 13 Joffe, B., Peichl, L., Hendrickson, A., Leonhardt, H. & Solovei, I. Diurnality and  
371 Nocturnality in Primates: An Analysis from the Rod Photoreceptor Nuclei  
372 Perspective. *Evolutionary Biology* **41**, 1-11, doi:10.1007/s11692-013-9240-9 (2014).
- 373 14 Gutman, R. & Dayan, T. Temporal partitioning: A experiment with two species of  
374 spiny mice. *Ecology* **86**, 164-173, doi:10.1890/03-0369 (2005).
- 375 15 Walls, G. L. *The vertebrate eye and its adaptive radiation*. (Cranbrook Institute of  
376 Science, 1942).
- 377 16 Crompton, A. W., Taylor, C. R. & Jagger, J. A. Evolution of homeothermy in  
378 mammals. *Nature* **272**, 333-336 (1978).
- 379 17 Barnosky, A. D. *et al.* Has the Earth's sixth mass extinction already arrived? *Nature*  
380 **471**, 51-57 (2011).
- 381 18 Brusatte, S. L. *et al.* The extinction of the dinosaurs. *Biological Reviews* **90**, 628-642,  
382 doi:10.1111/brv.12128 (2015).
- 383 19 Angielczyk, K. D. & Schmitz, L. Nocturnality in synapsids predates the origin of  
384 mammals by over 100 million years. *Proceedings of the Royal Society B: Biological*  
385 *Sciences* **281**, doi:10.1098/rspb.2014.1642 (2014).



Maor *et al.* Evolution of activity patterns in mammals

- 386 20 Hall, M. I., Kamilar, J. M. & Kirk, E. C. Eye shape and the nocturnal bottleneck of  
387 mammals. *Proceedings of the Royal Society B: Biological Sciences* **279**, 4962-4968,  
388 doi:10.1098/rspb.2012.2258 (2012).
- 389 21 Kim, J.-W. *et al.* Recruitment of Rod Photoreceptors from Short-Wavelength-  
390 Sensitive Cones during the Evolution of Nocturnal Vision in Mammals.  
391 *Developmental Cell* **37**, 520-532, doi:<http://dx.doi.org/10.1016/j.devcel.2016.05.023>  
392 (2016).
- 393 22 Reppert, S. M. & Weaver, D. R. Molecular Analysis of Mammalian Circadian  
394 Rhythms. *Annual Review of Physiology* **63**, 647-676,  
395 doi:10.1146/annurev.physiol.63.1.647 (2001).
- 396 23 Griffin, R. H., Matthews, L. J. & Nunn, C. L. Evolutionary disequilibrium and  
397 activity period in primates: A bayesian phylogenetic approach. *American Journal of*  
398 *Physical Anthropology* **147**, 409-416, doi:10.1002/ajpa.22008 (2012).
- 399 24 Santini, L., Rojas, D. & Donati, G. Evolving through day and night: origin and  
400 diversification of activity pattern in modern primates. *Behavioral Ecology*,  
401 doi:10.1093/beheco/arv012 (2015).
- 402 25 Heesy, C. P. & Ross, C. F. Evolution of activity patterns and chromatic vision in  
403 primates: morphometrics, genetics and cladistics. *J Hum Evol* **40**, 111-149,  
404 doi:10.1006/jhev.2000.0447 (2001).
- 405 26 Roll, U., Dayan, T. & Kronfeld-Schor, N. On the role of phylogeny in determining  
406 activity patterns of rodents. *Evolutionary Ecology* **20**, 479-490, doi:10.1007/s10682-  
407 006-0015-y (2006).
- 408 27 Meredith, R. W. *et al.* Impacts of the Cretaceous Terrestrial Revolution and KPg  
409 Extinction on Mammal Diversification. *Science* **334**, 521-524,  
410 doi:10.1126/science.1211028 (2011).

Maor *et al.* Evolution of activity patterns in mammals

- 411 28 Bininda-Emonds, O. R. P. *et al.* The delayed rise of present-day mammals. *Nature*  
412 **446**, 507-512,  
413 doi:[http://www.nature.com/nature/journal/v446/n7135/supinfo/nature05634\\_S1.html](http://www.nature.com/nature/journal/v446/n7135/supinfo/nature05634_S1.html)  
414 (2007).
- 415 29 Fritz, S. A., Bininda-Emonds, O. R. P. & Purvis, A. Geographical variation in  
416 predictors of mammalian extinction risk: big is bad, but only in the tropics. *Ecology*  
417 *Letters* **12**, 538-549, doi:10.1111/j.1461-0248.2009.01307.x (2009).
- 418 30 Meade, A. & Pagel, M. BayesTraits v3 (2017).
- 419 31 Sakamoto, M., Benton, M. J. & Venditti, C. Dinosaurs in decline tens of millions of  
420 years before their final extinction. *Proceedings of the National Academy of Sciences*  
421 **113**, 5036-5040, doi:10.1073/pnas.1521478113 (2016).
- 422 32 Close, Roger A., Friedman, M., Lloyd, Graeme T. & Benson, Roger B. J. Evidence  
423 for a Mid-Jurassic Adaptive Radiation in Mammals. *Current Biology* **25**, 2137-2142,  
424 doi:<http://dx.doi.org/10.1016/j.cub.2015.06.047> (2015).
- 425 33 Lee, Michael S. Y. & Beck, Robin M. D. Mammalian Evolution: A Jurassic Spark.  
426 *Current Biology* **25**, R759-R761, doi:<http://dx.doi.org/10.1016/j.cub.2015.07.008>  
427 (2015).
- 428 34 Wilson, G. P. *et al.* Adaptive radiation of multituberculate mammals before the  
429 extinction of dinosaurs. *Nature* **483**, 457-460,  
430 doi:[http://www.nature.com/nature/journal/v483/n7390/abs/nature10880.html#supple](http://www.nature.com/nature/journal/v483/n7390/abs/nature10880.html#supplementary-information)  
431 [mentary-information](http://www.nature.com/nature/journal/v483/n7390/abs/nature10880.html#supplementary-information) (2012).
- 432 35 Krause, D. W. *et al.* First cranial remains of a gondwanatherian mammal reveal  
433 remarkable mosaicism. *Nature* **515**, 512-517 (2014).
- 434 36 Ross, C. F. Into the Light: The Origin of Anthroidea. *Annual Review of*  
435 *Anthropology* **29**, 147-194, doi:10.1146/annurev.anthro.29.1.147 (2000).

Maor *et al.* Evolution of activity patterns in mammals

- 436 37 dos Reis, M., Donoghue, P. C. J. & Yang, Z. Neither phylogenomic nor  
437 palaeontological data support a Palaeogene origin of placental mammals. *Biology*  
438 *Letters* **10**, doi:10.1098/rsbl.2013.1003 (2014).
- 439 38 Foley, N. M., Springer, M. S. & Teeling, E. C. Mammal madness: is the mammal tree  
440 of life not yet resolved? *Philosophical Transactions of the Royal Society B: Biological*  
441 *Sciences* **371**, doi:10.1098/rstb.2015.0140 (2016).
- 442 39 Tarver, J. E. *et al.* The Interrelationships of Placental Mammals and the Limits of  
443 Phylogenetic Inference. *Genome Biology and Evolution*, doi:10.1093/gbe/evv261  
444 (2016).
- 445 40 Springer, M. S. *et al.* Waking the undead: Implications of a soft explosive model for  
446 the timing of placental mammal diversification. *Molecular Phylogenetics and*  
447 *Evolution* **106**, 86-102, doi:<http://dx.doi.org/10.1016/j.ympev.2016.09.017> (2017).
- 448 41 Donati, G. & Borgognini-Tarli, S. M. From darkness to daylight: cathemeral activity  
449 in primates. *Journal of Anthropological Sciences* **84**, 7-32 (2006).
- 450 42 Fullard, J. H. & Napoleone, N. Diel flight periodicity and the evolution of auditory  
451 defences in the Macrolepidoptera. *Animal Behaviour* **62**, 349-368,  
452 doi:<http://dx.doi.org/10.1006/anbe.2001.1753> (2001).
- 453 43 O'Leary, M. A. *et al.* The Placental Mammal Ancestor and the Post-K-Pg Radiation  
454 of Placentals. *Science* **339**, 662-667, doi:10.1126/science.1229237 (2013).
- 455 44 Schmitz, L. & Motani, R. Nocturnality in Dinosaurs Inferred from Scleral Ring and  
456 Orbit Morphology. *Science*, doi:10.1126/science.1200043 (2011).
- 457 45 Wilson, D. E. & Reeder, D. A. *Mammal Species of the World*. (John Hopkins  
458 University Press 2005).

Maor *et al.* Evolution of activity patterns in mammals

- 459 46 Price, S. A., Bininda-Emonds, O. R. P. & Gittleman, J. L. A complete phylogeny of  
460 the whales, dolphins and even-toed hoofed mammals (Cetartiodactyla). *Biological*  
461 *Reviews* **80**, 445-473, doi:10.1017/S1464793105006743 (2005).
- 462 47 O'Leary, M. A. & Gatesy, J. Impact of increased character sampling on the phylogeny  
463 of Cetartiodactyla (Mammalia): combined analysis including fossils. *Cladistics* **24**,  
464 397-442, doi:10.1111/j.1096-0031.2007.00187.x (2008).
- 465 48 Springer, M. S., Meredith, R. W., Teeling, E. C. & Murphy, W. J. Technical  
466 Comment on “The Placental Mammal Ancestor and the Post–K-Pg Radiation of  
467 Placentals”. *Science* **341**, 613-613, doi:10.1126/science.1238025 (2013).
- 468 49 Paradis, E., J., C. & K., S. APE: analyses of phylogenetics and evolution in R  
469 language. *Bioinformatics* **20**, 289-290 (2004).
- 470 50 Schliep, K. P. phangorn: phylogenetic analysis in R. *Bioinformatics* **27**, 592-593,  
471 doi:10.1093/bioinformatics/btq706 (2011).
- 472 51 R: A language and environment for statistical computing (R Foundation for Statistical  
473 Computing, Vienna, Austria, 2015).
- 474 52 Pagel, M. & Meade, A. Bayesian analysis of correlated evolution of discrete  
475 characters by reversible-jump Markov chain Monte Carlo. *The American Naturalist*  
476 **167**, 808-825 (2006).
- 477 53 Kirk, E. C. Effects of activity pattern on eye size and orbital aperture size in primates.  
478 *J Hum Evol* **51**, 159-170, doi:<http://dx.doi.org/10.1016/j.jhevol.2006.02.004> (2006).
- 479 54 Xie, W., Lewis, P. O., Fan, Y., Kuo, L. & Chen, M.-H. Improving Marginal  
480 Likelihood Estimation for Bayesian Phylogenetic Model Selection. *Systematic*  
481 *Biology* **60**, 150-160, doi:10.1093/sysbio/syq085 (2011).

Maor *et al.* Evolution of activity patterns in mammals

482 55 Revell, L. J. phytools: an R package for phylogenetic comparative biology (and other  
483 things). *Methods in Ecology and Evolution* **3**, 217-223, doi:10.1111/j.2041-  
484 210X.2011.00169.x (2012).

485

486

487

Maor *et al.* Evolution of activity patterns in mammals

488 **Supplementary Information** is available in the online version of the paper.

489

490 **Acknowledgements** We thank TCD Lucas, S Meiri, EE Dyer, O Comay and I Pizer-Mason  
491 for technical assistance and providing data, and N Kronfeld-Schor for discussion. This work  
492 was funded with support from ISF grant No. 785/09 (TD), Tel Aviv University GRTF fund  
493 and Naomi Kadar Foundation (RM), and NERC Open CASE PhD studentship  
494 (NE/H018565/1) (HFG).

495

496 **Author Contributions** RM, TD and KEJ developed the overall study design. RM collected  
497 and processed the data, and carried out the analyses with assistance from HFG. RM and KEJ  
498 led on the writing of the manuscript with significant contributions from all authors.

499

500 **Author Information** The authors declare no competing financial interests. Correspondence  
501 and requests for materials should be addressed to RM ([roimaor@post.tau.ac.il](mailto:roimaor@post.tau.ac.il)) or KEJ  
502 ([kate.e.jones@ucl.ac.uk](mailto:kate.e.jones@ucl.ac.uk)).

Maor *et al.* Evolution of activity patterns in mammals

503 **Figure 1. Activity patterns distribution across (a) the short-fuse (SF), and (b) the long-**  
504 **fuse (LF) estimates of mammalian evolution.** Species activity patterns are denoted by  
505 different colours in the perimeter circle, where nocturnal is denoted as blue; diurnal yellow;  
506 cathemeral green; and ambiguous magenta. Branch colours represent taxonomy, where  
507 Marsupials are pink; Afrotheria brown; Soricomorpha+Erinaceomorpha green; Chiroptera  
508 blue; Cetartiodactyla yellow; Carnivora grey; Primates purple; Rodentia orange; and all other  
509 orders are black. Mesozoic and Cenozoic eras are denoted by blue and white backgrounds,  
510 respectively. SF phylogeny follows<sup>28</sup> updated by<sup>29</sup>, and LF phylogeny is adapted from<sup>27</sup> (see  
511 Methods). Branch lengths are proportional to time (Myr).

512

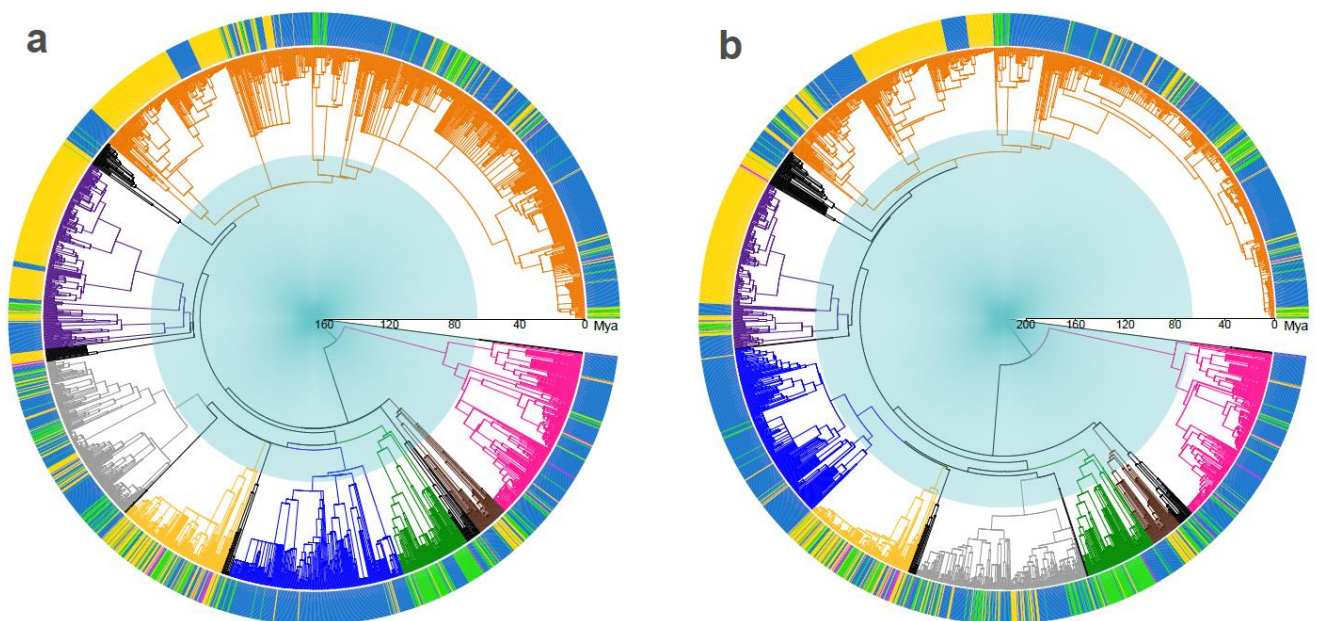

513

Maor *et al.* Evolution of activity patterns in mammals

514 **Figure 2. Posterior probability (PP) density of ancestral activity patterns**  
515 **reconstructions of the most recent common ancestor of crown-group Mammalia from**  
516 **(a) SF and (b) LF phylogenies.** Distribution curves are calculated from 1000 post-burnin  
517 rjMCMC samples, and modal PP values for each distribution are shown in bold. Colours  
518 correspond to activity patterns.

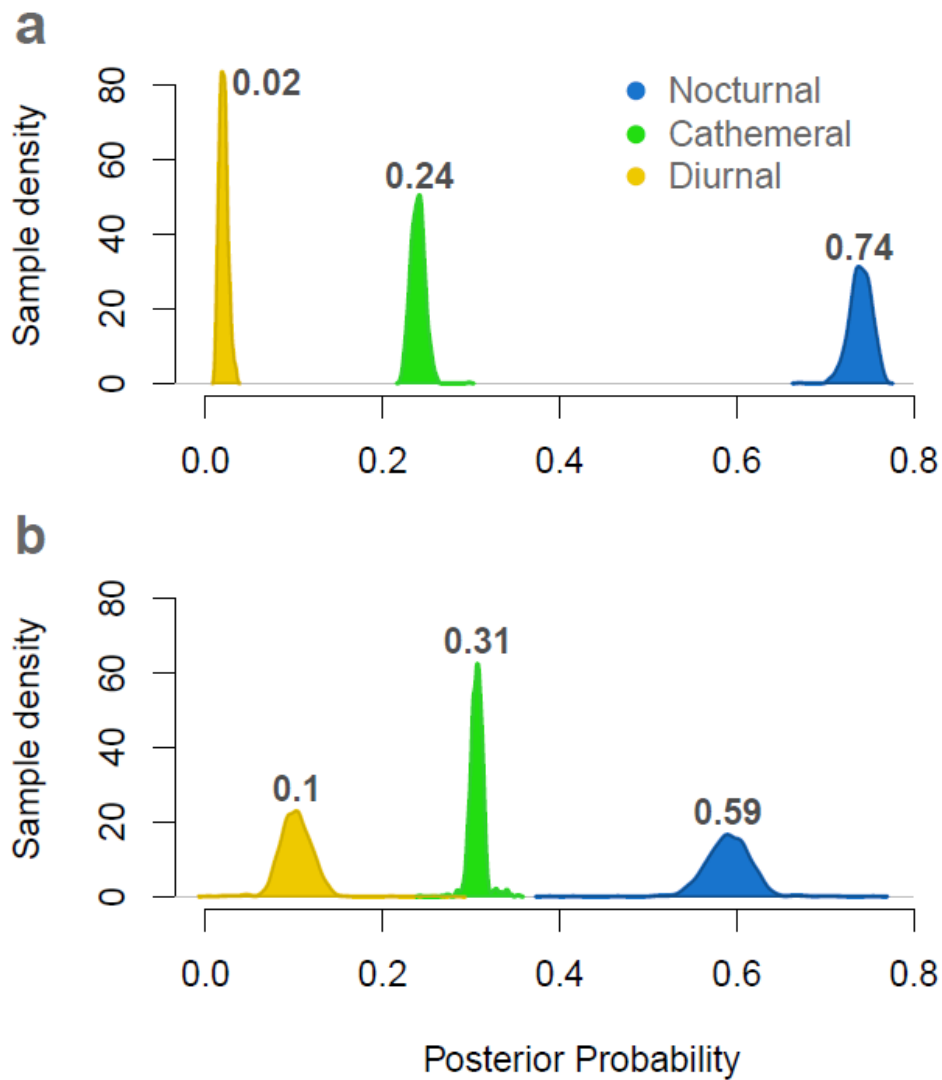

519

520



Maor *et al.* Evolution of activity patterns in mammals

521 **Figure 3. Reconstruction of ancestral activity patterns and character accumulation,**  
522 **across the ‘short fuse’ (SF) hypothesis of mammalian evolution.** (a) Ancestral activity  
523 pattern reconstruction across the SF phylogeny<sup>28</sup> updated by<sup>29</sup>. Pie charts correspond to  
524 ancestral reconstructions at each node, and colours denote the proportional value of the  
525 posterior probability (PP) of each activity pattern, where nocturnal is blue; cathemeral green;  
526 and diurnal yellow. Shading denotes geological era. Branch lengths are proportional to time,  
527 with branches younger than 45Mya replaced with wedges for visualisation purposes. The red  
528 dashed line represents the K-Pg boundary. (b) Lineages through time plot for activity  
529 patterns. The predominant activity pattern was assigned to each node based on PP values,  
530 with a minimum value of 0.67. Nodes with reconstructed activity pattern PP values of <0.67  
531 were excluded from the lineages through time plot.

Maor *et al.* Evolution of activity patterns in mammals

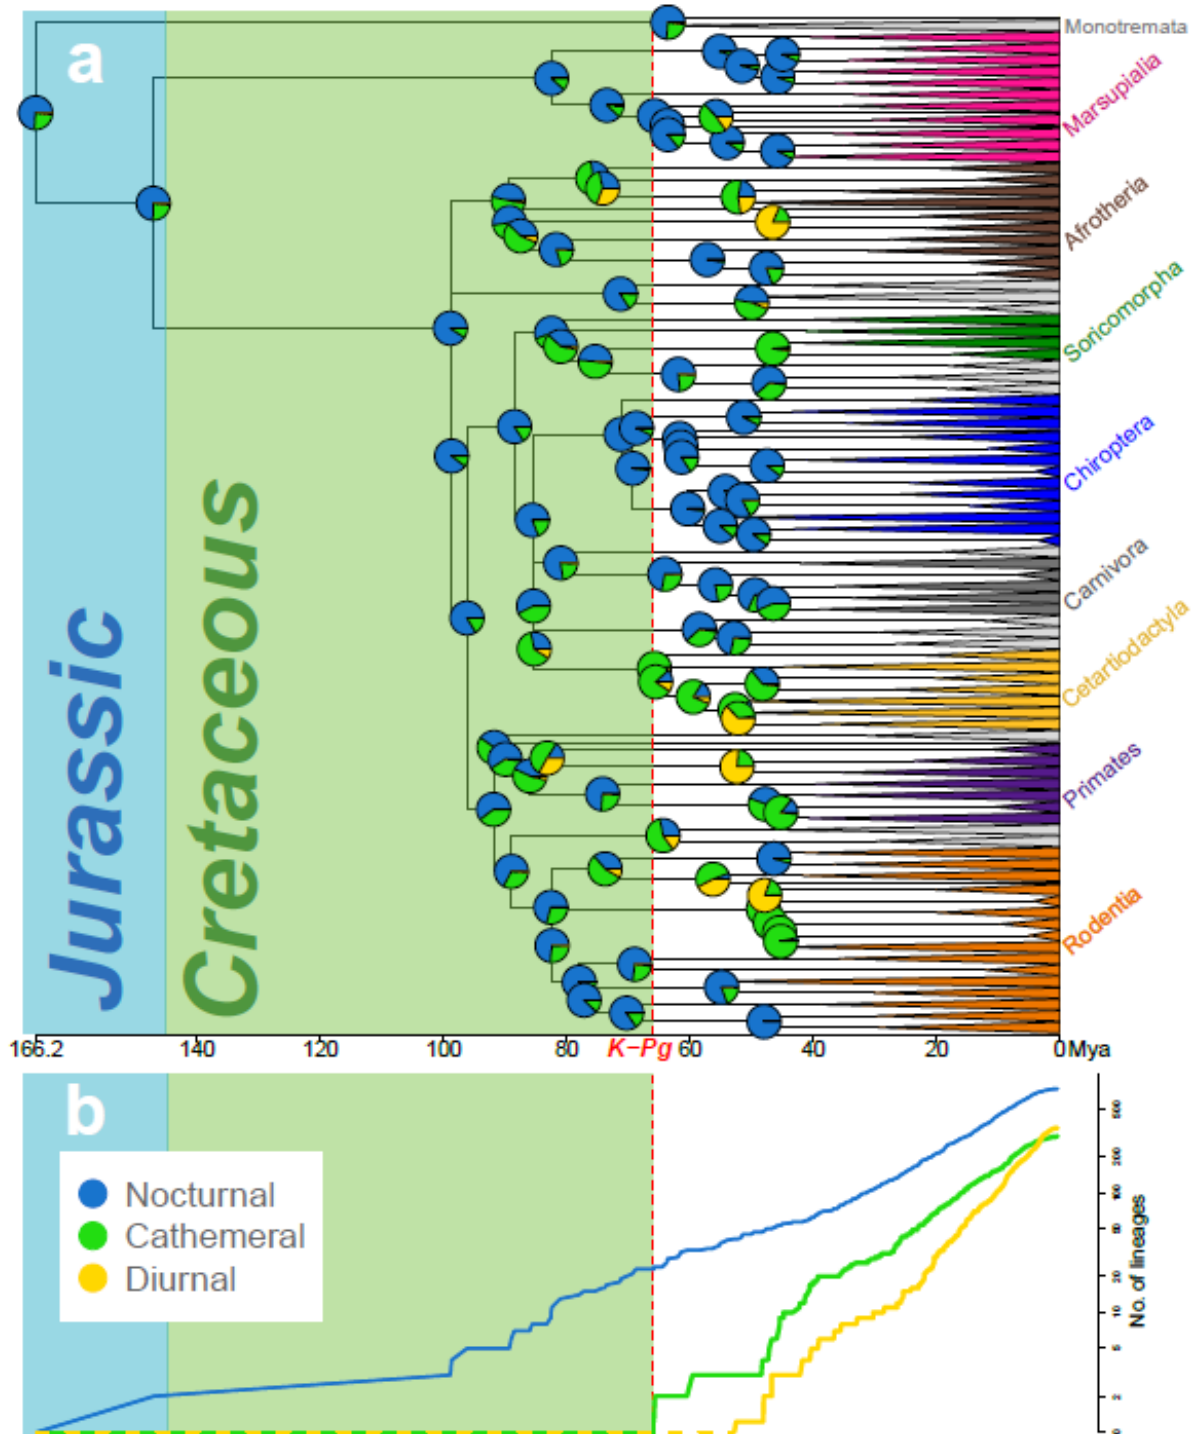

532

Maor *et al.* Evolution of activity patterns in mammals

533 **Figure 4. Reconstruction of ancestral activity patterns and character accumulation,**  
534 **across the ‘long fuse’ (LF) hypothesis of mammalian evolution.** (a) Ancestral activity  
535 pattern reconstruction across the LF phylogeny adapted from<sup>27</sup>. Pie charts correspond to  
536 ancestral reconstructions at each node, and colours denote the proportional value of the  
537 posterior probability (PP) of each activity pattern, where nocturnal is blue; cathemeral green;  
538 and diurnal yellow. Shading denotes geological era. Branch lengths are proportional to time,  
539 with branches younger than 45Mya replaced with wedges for visualisation purposes. The red  
540 dashed line represents the K-Pg boundary. (b) Lineages through time plot for activity  
541 patterns. The predominant activity pattern was assigned to each node based on PP values,  
542 with a minimum value of 0.67. Nodes with reconstructed activity pattern PP values of <0.67  
543 were excluded from the lineages through time plot.

Maor *et al.* Evolution of activity patterns in mammals

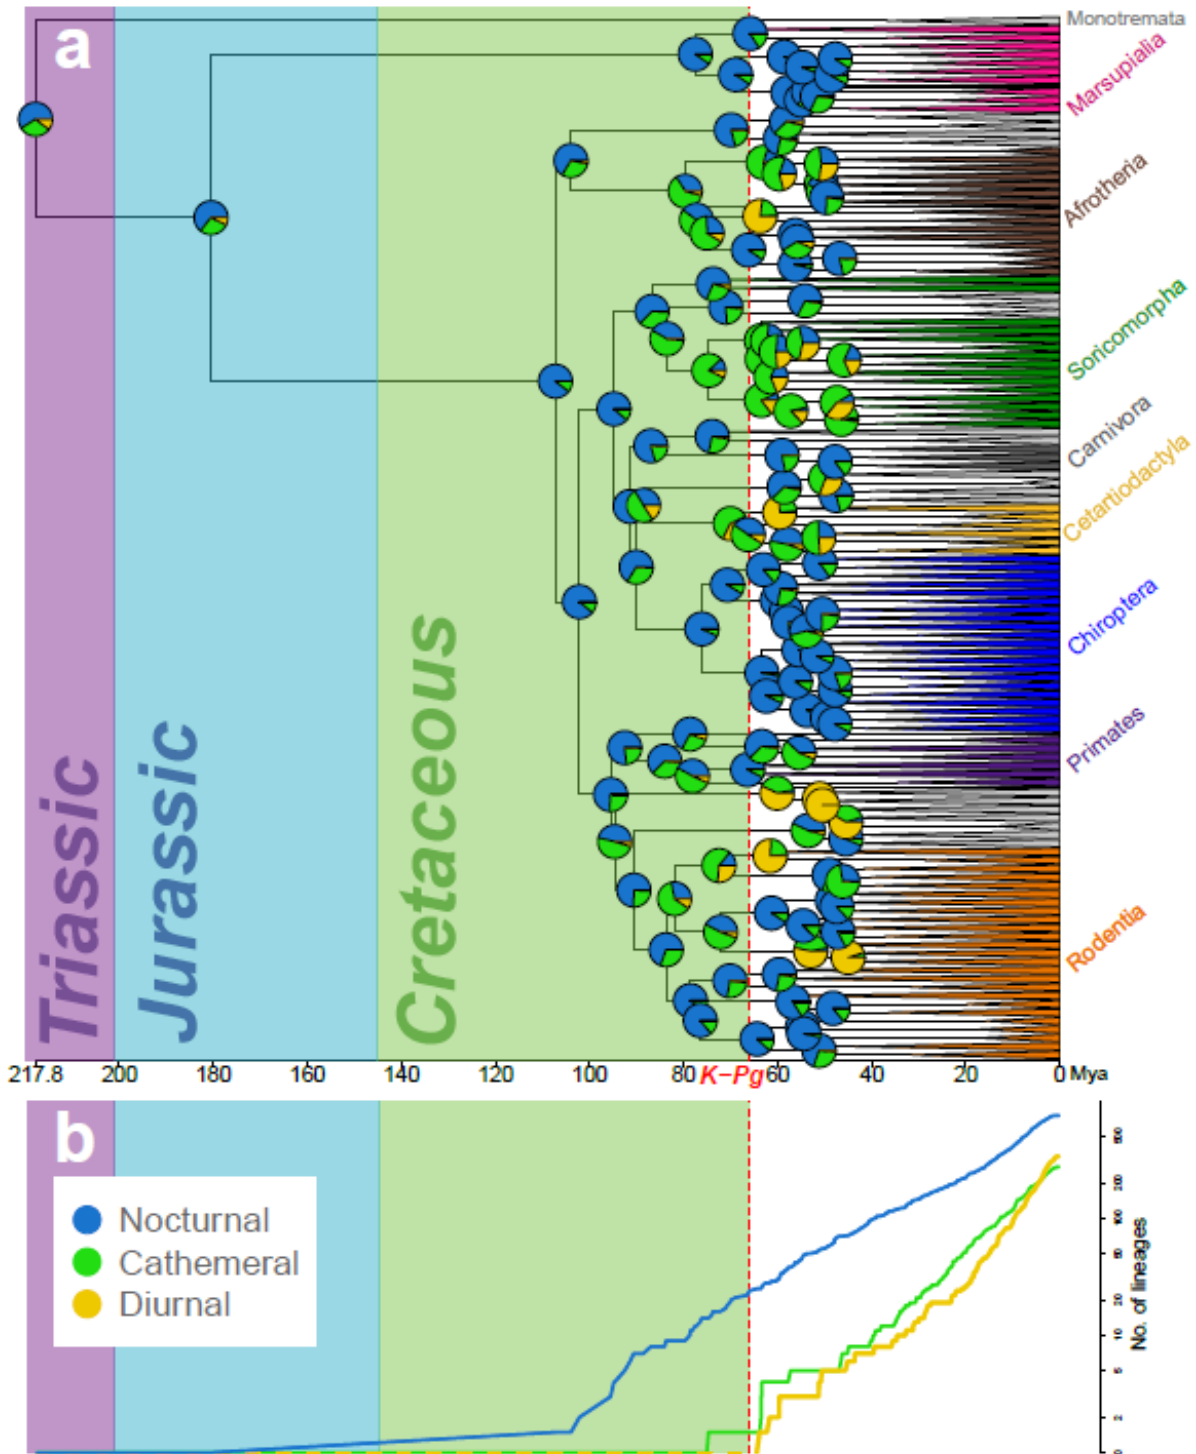

544

Maor *et al.* Evolution of activity patterns in mammals

545 **Table 1. Character transition rate matrix for SF and LF ancestral activity pattern**  
546 **reconstructions.** Transition rates are from the state in the column to the state in the row and  
547 represent model posterior values. Direct transitions between nocturnal and diurnal were not  
548 allowed (0) under our character state transition model.

549

| <b>Phylogeny</b> |            | <b>Transition rates</b> |            |         |
|------------------|------------|-------------------------|------------|---------|
|                  |            | Nocturnal               | Cathemeral | Diurnal |
| Short fuse       | Nocturnal  | -                       | 0.01       | 0       |
|                  | Cathemeral | 0.03                    | -          | 0.03    |
|                  | Diurnal    | 0                       | 0.01       | -       |
| Long fuse        | Nocturnal  | -                       | 1.97       | 0       |
|                  | Cathemeral | 7.46                    | -          | 7.41    |
|                  | Diurnal    | 0                       | 1.96       | -       |

550
